# Supplementary material
Source: PubMed Central journal article supplement (PMC7300306)
Supplement: mmc1.pdf [file mmc1.pdf]

**Biophysical Journal, Volume 118**

**Supplemental Information**

**Protein Diffusion on Charged Biopolymers: DNA versus Microtubule**

**Lavi S. Bigman and Yaakov Levy**

**Table S1. List of diffusion coefficients for DNA and MT binding proteins.**

| <b>Protein name</b> | <b>Rg (nm)</b> | <b>N</b> | <b>D1(<math>\mu\text{m}^2/\text{s}</math>)</b> | <b>surface</b> | <b>Ref.</b> |
|---------------------|----------------|----------|------------------------------------------------|----------------|-------------|
| Nhp6                | 1.41           | 93       | 0.34                                           | DNA            | (1)         |
| HU                  | 1.39           | 90       | 0.49                                           | DNA            | (1)         |
| Fis                 | 1.44           | 98       | 0.16                                           | DNA            | (1)         |
| PCNA                | 2.91           | 786      | 1.16                                           | DNA            | (2)         |
| B clamp             | 2.84           | 732      | 0.01                                           | DNA            | (3)         |
| P53 full            | 2.30           | 393      | 0.16                                           | DNA            | (4)         |
| hOgg1               | 2.20           | 345      | 0.58                                           | DNA            | (5)         |
| AVP-pVlc            | 1.88           | 215      | 2.20                                           | DNA            | (5)         |
| MutY                | 2.25           | 369      | 0.17                                           | DNA            | (5)         |
| MutM M74A           | 2.02           | 269      | 0.22                                           | DNA            | (5)         |
| BamHI               | 1.87           | 213      | 0.57                                           | DNA            | (5)         |
| Ilacl               | 3.36           | 1196     | 0.05                                           | DNA            | (6)         |
| EcoRV CyB3          | 1.96           | 245      | 1.20                                           | DNA            | (7)         |
| MSH2-MSH6           | 4.14           | 2206     | 0.005                                          | DNA            | (8)         |
| RNA polymerase      | 4.71           | 3233     | 0.01                                           | DNA            | (9)         |
| Tale-cys3           | 3.19           | 1030     | 0.58                                           | DNA            | (10)        |
| HoxD9               | 1.36           | 60       | 0.05                                           | DNA            | (11)        |
| Tau                 | 2.39           | 441      | 0.29                                           | MT             | (12–14)     |
| EB1                 | 2.51           | 506      | 0.02                                           | MT             | (15)        |
| PRC1                | 2.59           | 555      | 0.04                                           | MT             | (15)        |
| xmap215             | 4.02           | 2032     | 0.30                                           | MT             | (16)        |
| NuMA                | 2.43           | 461      | 0.05                                           | MT             | (15)        |

|                         |      |      |        |    |      |
|-------------------------|------|------|--------|----|------|
| p150 (basic domain)     | 2.56 | 540  | 0.0015 | MT | (17) |
| p150                    | 1.51 | 114  | 0.0017 | MT | (17) |
| p150                    | 3.43 | 1265 | 0.0014 | MT | (17) |
| clip170                 | 3.77 | 1676 | 0.0035 | MT | (18) |
| coiled-col+Aurora-B     | 2.84 | 726  | 0.06   | MT | (19) |
| Ndc80                   | 3.87 | 1814 | 0.09   | MT | (20) |
| skal                    | 2.92 | 788  | 0.23   | MT | (20) |
| Clasp2                  | 3.66 | 1532 | 0.33   | MT | (20) |
| EB1                     | 2.02 | 268  | 0.31   | MT | (21) |
| NDC80                   | 3.69 | 1576 | 0.17   | MT | (22) |
| Mcak+GFP                | 3.12 | 963  | 0.38   | MT | (23) |
| Qdot - Myosin Va        | 4.94 | 3710 | 0.26   | MT | (24) |
| Myosin Va single headed | 3.90 | 1855 | 0.36   | MT | (23) |
| Kinesin 5 ADP (Eg5)     | 5.16 | 4224 | 0.0007 | MT | (25) |
| Kinesin 5 ATP (Eg5)     | 5.16 | 4224 | 0.0008 | MT | (25) |
| Yeast kinesin 8 (kip3)  | 3.21 | 1043 | 0.0043 | MT | (26) |
| Dyenin , b IC subunit   | 5.30 | 4568 | 0.05   | MT | (27) |
| Dyenin, outer arm       | 6.71 | 9136 | 0.01   | MT | (27) |
| CENP-E                  | 3.56 | 1422 | 0.07   | MT | (28) |
| CENP-E tail             | 2.39 | 437  | 1.6    | MT | (29) |
| POK2 (1-589)            | 3.75 | 1654 | 0.04   | MT | (30) |

**Table S2. Electrostatic properties of DNA and MT binding proteins**

| <b>PDB ID</b> | <b>Chain</b> | <b>Number of residues</b> | <b>Positive residues</b> | <b>Negative residues</b> | <b>Total charge</b> | <b>Dipole</b> | <b>Type</b> |
|---------------|--------------|---------------------------|--------------------------|--------------------------|---------------------|---------------|-------------|
| 1bc8          | C            | 93                        | 15                       | 6                        | 9                   | 405           | DBP         |
| 1c9b          | A            | 207                       | 31                       | 22                       | 9                   | 788           | DBP         |
| 1cf7          | B            | 82                        | 14                       | 10                       | 4                   | 279           | DBP         |
| 1e3o          | C            | 132                       | 23                       | 20                       | 2                   | 441           | DBP         |
| 1efa          | A            | 328                       | 26                       | 30                       | -3                  | 1044          | DBP         |
| 1f4k          | A            | 115                       | 23                       | 17                       | 6                   | 412           | DBP         |
| 1fjl          | A            | 65                        | 13                       | 8                        | 6                   | 577           | DBP         |
| 1hcr          | A            | 52                        | 10                       | 3                        | 7                   | 285           | DBP         |
| 1ign          | A            | 189                       | 31                       | 30                       | 2                   | 594           | DBP         |
| 1je8          | A            | 63                        | 14                       | 7                        | 8                   | 305           | DBP         |
| 1jt0          | A            | 188                       | 25                       | 23                       | 2                   | 398           | DBP         |
| 1k78          | A            | 124                       | 21                       | 11                       | 10                  | 480           | DBP         |
| 1lmb          | 3            | 87                        | 10                       | 12                       | -3                  | 395           | DBP         |
| 1mm           | C            | 77                        | 16                       | 7                        | 9                   | 350           | DBP         |
| 1orn          | A            | 214                       | 36                       | 26                       | 10                  | 929           | DBP         |
| 1per          | L            | 63                        | 9                        | 5                        | 4                   | 236           | DBP         |
| 1pp7          | U            | 114                       | 18                       | 13                       | 4                   | 420           | DBP         |
| 1puf          | A            | 77                        | 21                       | 7                        | 14                  | 479           | DBP         |
| 1puf          | B            | 73                        | 15                       | 8                        | 7                   | 828           | DBP         |
| 1r71          | A            | 114                       | 18                       | 23                       | -6                  | 740           | DBP         |
| 1r8d          | A            | 109                       | 16                       | 18                       | -2                  | 363           | DBP         |
| 1rep          | C            | 214                       | 32                       | 21                       | 11                  | 684           | DBP         |
| 1rh6          | B            | 52                        | 11                       | 7                        | 4                   | 245           | DBP         |
| 1sax          | A            | 120                       | 21                       | 18                       | 3                   | 1258          | DBP         |
| 1sfu          | A            | 70                        | 12                       | 6                        | 6                   | 379           | DBP         |
| 1tc3          | C            | 51                        | 9                        | 5                        | 3                   | 346           | DBP         |
| 1tro          | A            | 104                       | 13                       | 17                       | -4                  | 641           | DBP         |
| 2cgp          | A            | 200                       | 24                       | 23                       | 0                   | 455           | DBP         |
| 1l3l          | A            | 447                       | 67                       | 60                       | 7                   | 907           | DBP         |
| 1hlv          | A            | 131                       | 29                       | 15                       | 14                  | 712           | DBP         |
| 2irf          | G            | 109                       | 20                       | 12                       | 9                   | 294           | DBP         |
| 1dsz          | A            | 75                        | 14                       | 6                        | 7                   | 385           | DBP         |
| 1hwt          | C            | 70                        | 16                       | 10                       | 7                   | 642           | DBP         |
| 1mey          | C            | 83                        | 16                       | 7                        | 8                   | 173           | DBP         |
| 1ozj          | A            | 126                       | 23                       | 15                       | 8                   | 782           | DBP         |
| 1tsr          | B            | 194                       | 22                       | 19                       | 3                   | 622           | DBP         |
| 2drp          | A            | 63                        | 13                       | 4                        | 9                   | 238           | DBP         |

|      |   |     |    |     |     |      |     |
|------|---|-----|----|-----|-----|------|-----|
| 1a0a | A | 63  | 10 | 5   | 5   | 810  | DBP |
| 1am9 | A | 80  | 19 | 8   | 11  | 629  | DBP |
| 1dh3 | A | 55  | 16 | 9   | 8   | 1372 | DBP |
| 1gd2 | E | 65  | 15 | 10  | 4   | 1591 | DBP |
| 1jnm | A | 56  | 17 | 6   | 12  | 1734 | DBP |
| 1llm | C | 87  | 18 | 13  | 5   | 1206 | DBP |
| 1mdy | A | 68  | 18 | 8   | 10  | 1276 | DBP |
| 1nkp | B | 83  | 17 | 11  | 5   | 1375 | DBP |
| 1nlw | A | 79  | 19 | 10  | 9   | 851  | DBP |
| 1b3t | A | 147 | 16 | 12  | 5   | 1241 | DBP |
| 1f44 | A | 316 | 47 | 37  | 10  | 1681 | DBP |
| 1flo | A | 405 | 53 | 38  | 15  | 1284 | DBP |
| 1fzp | B | 105 | 20 | 17  | 3   | 581  | DBP |
| 1h89 | C | 115 | 26 | 12  | 14  | 686  | DBP |
| 1jfi | B | 135 | 18 | 20  | -3  | 599  | DBP |
| 1jj4 | A | 74  | 11 | 5   | 6   | 215  | DBP |
| 1ku7 | A | 73  | 18 | 14  | 4   | 421  | DBP |
| 1kx5 | B | 102 | 25 | 7   | 18  | 1313 | DBP |
| 1kx5 | C | 128 | 26 | 9   | 17  | 1183 | DBP |
| 1kx5 | D | 122 | 28 | 9   | 19  | 1477 | DBP |
| 1mm  | A | 85  | 15 | 9   | 6   | 960  | DBP |
| 1p7d | A | 279 | 44 | 36  | 8   | 1109 | DBP |
| 1skn | P | 74  | 17 | 10  | 7   | 369  | DBP |
| 1bdt | A | 52  | 11 | 7   | 4   | 301  | DBP |
| 1c8c | A | 64  | 16 | 8   | 8   | 152  | DBP |
| 1ecr | A | 305 | 42 | 32  | 9   | 503  | DBP |
| 1h6f | A | 184 | 31 | 19  | 11  | 452  | DBP |
| 1hjc | A | 118 | 15 | 10  | 5   | 423  | DBP |
| 1mjo | A | 104 | 16 | 19  | -3  | 815  | DBP |
| 1owf | B | 94  | 16 | 12  | 4   | 388  | DBP |
| 1p71 | A | 94  | 17 | 13  | 4   | 324  | DBP |
| 1qna | A | 182 | 29 | 15  | 14  | 892  | DBP |
| 1a3q | A | 285 | 45 | 33  | 12  | 878  | DBP |
| 1e3m | A | 765 | 90 | 105 | -15 | 1736 | DBP |
| 1j3e | A | 115 | 12 | 12  | -1  | 643  | DBP |
| 1jb7 | A | 460 | 62 | 53  | 9   | 420  | DBP |
| 1jb7 | B | 216 | 29 | 26  | 3   | 196  | DBP |
| 1jey | A | 493 | 72 | 69  | 3   | 1953 | DBP |
| 1mnn | A | 290 | 40 | 36  | 4   | 1819 | DBP |
| 1p7h | L | 286 | 38 | 31  | 7   | 795  | DBP |
| 1pt3 | A | 128 | 28 | 17  | 12  | 466  | DBP |
| 1a31 | A | 457 | 84 | 69  | 15  | 774  | DBP |

|      |   |     |     |     |     |      |     |
|------|---|-----|-----|-----|-----|------|-----|
| 1a73 | A | 162 | 11  | 9   | 2   | 582  | DBP |
| 1bl0 | A | 116 | 17  | 14  | 2   | 593  | DBP |
| 1cez | A | 862 | 104 | 107 | -3  | 2074 | DBP |
| 1d02 | A | 197 | 25  | 27  | -2  | 373  | DBP |
| 1dc1 | A | 310 | 40  | 45  | -4  | 904  | DBP |
| 1dct | A | 324 | 44  | 34  | 10  | 1011 | DBP |
| 1dfm | A | 218 | 28  | 32  | -3  | 885  | DBP |
| 1diz | A | 282 | 28  | 26  | 2   | 526  | DBP |
| 1emh | A | 223 | 26  | 21  | 5   | 573  | DBP |
| 1bhm | B | 208 | 28  | 32  | -4  | 579  | DBP |
| 1ewn | A | 200 | 26  | 22  | 4   | 356  | DBP |
| 1fiu | A | 286 | 30  | 34  | -4  | 483  | DBP |
| 1g38 | A | 393 | 53  | 50  | 3   | 1120 | DBP |
| 1g9z | A | 152 | 22  | 17  | 5   | 306  | DBP |
| 1i3j | A | 96  | 19  | 7   | 13  | 929  | DBP |
| 1i6j | A | 256 | 27  | 24  | 3   | 764  | DBP |
| 1iaw | A | 304 | 39  | 40  | -2  | 1035 | DBP |
| 1jx4 | A | 335 | 62  | 51  | 11  | 799  | DBP |
| 1k3x | A | 253 | 30  | 27  | 2   | 563  | DBP |
| 1kc6 | A | 249 | 31  | 35  | -4  | 668  | DBP |
| 1m3q | A | 314 | 29  | 31  | -2  | 568  | DBP |
| 1m5r | A | 351 | 49  | 43  | 6   | 827  | DBP |
| 1mus | A | 458 | 69  | 52  | 17  | 1452 | DBP |
| 1nk4 | A | 580 | 77  | 89  | -12 | 1583 | DBP |
| 1p8k | Z | 252 | 39  | 28  | 11  | 708  | DBP |
| 1qum | A | 279 | 26  | 38  | -12 | 409  | DBP |
| 1r2z | A | 273 | 40  | 31  | 8   | 975  | DBP |
| 1rrq | A | 344 | 43  | 54  | -11 | 918  | DBP |
| 1rzt | A | 327 | 43  | 35  | 8   | 1045 | DBP |
| 1sl1 | A | 678 | 84  | 101 | -17 | 2976 | DBP |
| 1sx5 | A | 244 | 34  | 30  | 4   | 427  | DBP |
| 1t3n | A | 388 | 48  | 45  | 3   | 1530 | DBP |
| 1vas | A | 137 | 22  | 16  | 6   | 493  | DBP |
| 2dnj | A | 253 | 21  | 29  | -8  | 349  | DBP |
| 3pvi | A | 156 | 18  | 20  | -2  | 633  | DBP |
| 6mht | A | 327 | 40  | 39  | 1   | 1019 | DBP |
| 1dew | A | 279 | 35  | 34  | 1   | 747  | DBP |
| 1oup | A | 210 | 27  | 20  | 7   | 985  | DBP |
| 2p5o | A | 831 | 108 | 116 | -6  | 1763 | DBP |
| 6hyo | A | 131 | 20  | 19  | 0   | 547  | MBP |
| 2qjz | A | 117 | 17  | 14  | 2   | 613  | MBP |
| 5lxx | A | 477 | 46  | 63  | -17 | 758  | MBP |

|      |   |     |    |    |     |      |     |
|------|---|-----|----|----|-----|------|-----|
| 1f9v | A | 313 | 31 | 35 | -4  | 727  | MBP |
| 2qfa | A | 137 | 22 | 25 | -3  | 852  | MBP |
| 5lzn | A | 111 | 14 | 11 | 4   | 252  | MBP |
| 4kml | A | 109 | 10 | 14 | -4  | 273  | MBP |
| 4o59 | O | 332 | 36 | 33 | 3   | 602  | MBP |
| 5d94 | A | 119 | 18 | 16 | 3   | 614  | MBP |
| 2xhi | A | 316 | 30 | 30 | 1   | 666  | MBP |
| 2zfi | A | 329 | 40 | 41 | -1  | 1514 | MBP |
| 5fmu | A | 131 | 22 | 16 | 6   | 483  | MBP |
| 1ry6 | A | 319 | 46 | 42 | 4   | 470  | MBP |
| 2o0a | A | 270 | 31 | 38 | -6  | 387  | MBP |
| 2vvg | A | 308 | 38 | 35 | 2   | 881  | MBP |
| 4a14 | A | 296 | 29 | 41 | -13 | 1437 | MBP |
| 4ggf | C | 108 | 13 | 20 | -6  | 336  | MBP |
| 3mmy | A | 354 | 35 | 35 | 0   | 617  | MBP |
| 3zcw | A | 321 | 39 | 42 | -3  | 1039 | MBP |
| 1fzq | A | 176 | 20 | 23 | -3  | 560  | MBP |
| 4b91 | A | 474 | 49 | 56 | -7  | 980  | MBP |
| 3zfd | A | 340 | 45 | 40 | 4   | 712  | MBP |
| 3nrx | A | 123 | 25 | 24 | 1   | 565  | MBP |
| 6mq7 | A | 244 | 31 | 33 | -2  | 616  | MBP |
| 1bg2 | A | 323 | 39 | 43 | -5  | 968  | MBP |
| 1eo6 | A | 116 | 18 | 17 | 1   | 249  | MBP |
| 3b6u | A | 323 | 44 | 39 | 4   | 622  | MBP |
| 5wde | A | 320 | 34 | 43 | -8  | 1206 | MBP |
| 5fmt | A | 134 | 16 | 14 | 2   | 170  | MBP |
| 2of3 | A | 266 | 38 | 35 | 3   | 582  | MBP |
| 2qjx | A | 115 | 19 | 15 | 4   | 380  | MBP |
| 3dc4 | A | 291 | 25 | 26 | -1  | 828  | MBP |
| 4au8 | A | 276 | 37 | 32 | 5   | 964  | MBP |
| 6ctn | A | 326 | 52 | 47 | 5   | 1152 | MBP |
| 3wx8 | A | 153 | 21 | 17 | 4   | 302  | MBP |
| 4g3a | A | 220 | 28 | 32 | -3  | 757  | MBP |
| 3nwn | A | 308 | 32 | 35 | -2  | 663  | MBP |
| 4ja7 | A | 466 | 58 | 62 | -4  | 2114 | MBP |
| 4c9y | A | 120 | 23 | 14 | 9   | 210  | MBP |
| 2heh | A | 324 | 47 | 37 | 10  | 936  | MBP |
| 6mq5 | A | 227 | 30 | 27 | 2   | 584  | MBP |
| 2ct9 | A | 185 | 25 | 35 | -10 | 723  | MBP |
| 3cob | A | 355 | 48 | 44 | 5   | 566  | MBP |
| 3lre | A | 289 | 35 | 30 | 5   | 836  | MBP |
| 6jzc | A | 251 | 35 | 22 | 13  | 803  | MBP |

|      |   |     |    |     |     |      |             |
|------|---|-----|----|-----|-----|------|-------------|
| 6nje | A | 297 | 37 | 32  | 5   | 435  | MBP         |
| 1ft1 | A | 315 | 40 | 50  | -10 | 333  | MBP         |
| 5wdh | A | 298 | 28 | 30  | -3  | 661  | MBP         |
| 1goj | A | 354 | 42 | 38  | 4   | 938  | MBP         |
| 5azh | A | 127 | 16 | 18  | -3  | 600  | MBP         |
| 6nwp | A | 75  | 13 | 7   | 6   | 507  | MBP         |
| 2ggm | A | 142 | 25 | 38  | -14 | 510  | MBP         |
| 3t0q | A | 304 | 34 | 34  | 0   | 779  | MBP         |
| 3u06 | A | 359 | 37 | 48  | -11 | 850  | MBP         |
| 6b5c | A | 293 | 43 | 47  | -4  | 771  | MBP         |
| 4gkp | A | 229 | 28 | 30  | -1  | 361  | MBP         |
| 1t5c | A | 322 | 42 | 36  | 5   | 548  | MBP         |
| 3fwb | A | 153 | 18 | 39  | -21 | 735  | MBP         |
| 4xa3 | A | 142 | 20 | 28  | -9  | 469  | MBP         |
| 5x3e | A | 375 | 43 | 48  | -5  | 678  | MBP         |
| 5c46 | F | 175 | 22 | 23  | -2  | 385  | MBP         |
| 4bn2 | A | 326 | 37 | 32  | 6   | 891  | MBP         |
| 5gsz | A | 306 | 33 | 40  | -7  | 604  | MBP         |
| 4rfx | A | 100 | 14 | 26  | -12 | 481  | MBP         |
| 2owm | A | 328 | 38 | 45  | -6  | 1462 | MBP         |
| 5an9 | J | 250 | 46 | 40  | 6   | 922  | MBP         |
| 5wc1 | A | 262 | 34 | 37  | -3  | 850  | MBP         |
| 4aj5 | K | 108 | 19 | 18  | 1   | 857  | MBP         |
| 6gvw | A | 312 | 33 | 35  | -2  | 719  | MBP         |
| 6b0i | K | 368 | 52 | 41  | 11  | 603  | MBP         |
| 6h3c | A | 255 | 34 | 29  | 5   | 699  | MBP         |
| 5nd4 | C | 337 | 42 | 31  | 11  | 598  | MBP         |
| 5mlv | A | 344 | 41 | 40  | 0   | 910  | MBP         |
| 5mm4 | K | 382 | 44 | 45  | -1  | 652  | MBP         |
| 5mjs | D | 121 | 17 | 16  | 1   | 335  | MBP         |
| 5m5c | C | 118 | 16 | 12  | 4   | 357  | MBP         |
| 1ycs | A | 191 | 22 | 19  | 3   | 593  | heterodimer |
| 1ycs | B | 193 | 11 | 35  | -25 | 755  | heterodimer |
| 1a4y | A | 460 | 40 | 62  | -22 | 1362 | heterodimer |
| 1a4y | B | 123 | 20 | 10  | 10  | 319  | heterodimer |
| 1qbk | B | 856 | 79 | 121 | -41 | 973  | heterodimer |
| 1qbk | C | 187 | 27 | 18  | 9   | 1301 | heterodimer |
| 1am4 | A | 199 | 15 | 20  | -6  | 763  | heterodimer |
| 1am4 | D | 174 | 19 | 21  | -3  | 399  | heterodimer |
| 1emv | A | 83  | 7  | 15  | -8  | 370  | heterodimer |
| 1emv | B | 131 | 26 | 21  | 5   | 291  | heterodimer |
| 1fin | A | 298 | 37 | 33  | 4   | 142  | heterodimer |



|      |   |     |    |    |     |      |             |
|------|---|-----|----|----|-----|------|-------------|
| 1fin | B | 260 | 26 | 30 | -4  | 738  | heterodimer |
| 1d09 | A | 310 | 30 | 35 | -5  | 954  | heterodimer |
| 1d09 | B | 153 | 19 | 19 | 0   | 427  | heterodimer |
| 1wq1 | R | 166 | 19 | 27 | -8  | 300  | heterodimer |
| 1wq1 | G | 320 | 34 | 40 | -6  | 764  | heterodimer |
| 1fss | A | 532 | 49 | 58 | -9  | 1847 | heterodimer |
| 1fss | B | 61  | 9  | 5  | 4   | 212  | heterodimer |
| 1ef1 | A | 289 | 45 | 40 | 5   | 1925 | heterodimer |
| 1ef1 | C | 87  | 19 | 19 | 0   | 221  | heterodimer |
| 1f60 | A | 440 | 61 | 54 | 7   | 366  | heterodimer |
| 1f60 | B | 90  | 7  | 19 | -13 | 583  | heterodimer |
| 1itb | A | 153 | 18 | 19 | -1  | 507  | heterodimer |
| 1itb | B | 310 | 36 | 39 | -3  | 1952 | heterodimer |
| 1ai8 | H | 249 | 37 | 30 | 7   | 419  | heterodimer |
| 1ai8 | I | 9   | 0  | 4  | -5  | 112  | heterodimer |
| 2pcf | A | 99  | 6  | 15 | -9  | 292  | heterodimer |
| 2pcf | B | 250 | 27 | 28 | -1  | 806  | heterodimer |
| 1bml | A | 250 | 26 | 23 | 3   | 349  | heterodimer |
| 1bml | C | 318 | 37 | 51 | -14 | 457  | heterodimer |
| 1frv | A | 262 | 22 | 28 | -6  | 244  | heterodimer |
| 1frv | B | 530 | 60 | 60 | 0   | 819  | heterodimer |
| 2pcb | A | 294 | 33 | 44 | -11 | 844  | heterodimer |
| 2pcb | B | 104 | 21 | 12 | 9   | 242  | heterodimer |
| 1tba | A | 67  | 5  | 14 | -10 | 288  | heterodimer |
| 1tba | B | 180 | 27 | 15 | 12  | 855  | heterodimer |
| 12as | A | 327 | 33 | 47 | -14 | 787  | homodimer   |
| 1a3c | A | 166 | 23 | 27 | -4  | 603  | homodimer   |
| 1a4i | A | 285 | 30 | 36 | -6  | 407  | homodimer   |
| 1a4u | A | 254 | 25 | 24 | 1   | 608  | homodimer   |
| 1aa7 | A | 158 | 18 | 16 | 2   | 457  | homodimer   |
| 1ad3 | A | 446 | 48 | 54 | -6  | 637  | homodimer   |
| 1ade | A | 431 | 50 | 60 | -10 | 742  | homodimer   |
| 1af5 | A | 126 | 15 | 12 | 4   | 257  | homodimer   |
| 1afw | A | 390 | 38 | 41 | -2  | 915  | homodimer   |
| 1ajs | A | 412 | 45 | 43 | 2   | 523  | homodimer   |
| 1amk | A | 250 | 25 | 23 | 2   | 86   | homodimer   |
| 1aor | A | 605 | 73 | 84 | -11 | 843  | homodimer   |
| 1aq6 | A | 245 | 23 | 30 | -7  | 190  | homodimer   |
| 1auo | A | 218 | 15 | 24 | -9  | 231  | homodimer   |
| 1b3a | A | 67  | 10 | 5  | 4   | 408  | homodimer   |
| 1b5e | A | 241 | 28 | 33 | -5  | 136  | homodimer   |
| 1b67 | A | 68  | 13 | 12 | 1   | 232  | homodimer   |

|      |   |     |    |    |     |      |           |
|------|---|-----|----|----|-----|------|-----------|
| 1b8a | A | 438 | 60 | 76 | -16 | 3101 | homodimer |
| 1b8j | A | 448 | 41 | 52 | -11 | 279  | homodimer |
| 1bam | A | 200 | 26 | 31 | -5  | 794  | homodimer |
| 1bbh | A | 131 | 14 | 18 | -4  | 454  | homodimer |
| 1bd0 | A | 381 | 42 | 45 | -3  | 663  | homodimer |
| 1bif | A | 432 | 54 | 64 | -10 | 127  | homodimer |
| 1biq | A | 339 | 33 | 48 | -15 | 167  | homodimer |
| 1bis | A | 146 | 16 | 16 | 0   | 321  | homodimer |
| 1bjw | A | 381 | 44 | 50 | -6  | 1000 | homodimer |
| 1bkp | A | 278 | 31 | 40 | -9  | 768  | homodimer |
| 1bmd | A | 327 | 36 | 42 | -6  | 485  | homodimer |
| 1brw | A | 433 | 52 | 57 | -5  | 935  | homodimer |
| 1bsl | A | 323 | 28 | 44 | -16 | 105  | homodimer |
| 1bsr | A | 124 | 17 | 9  | 9   | 406  | homodimer |
| 1buo | A | 121 | 8  | 16 | -8  | 843  | homodimer |
| 1bxg | A | 349 | 24 | 41 | -17 | 979  | homodimer |
| 1bxk | A | 341 | 32 | 43 | -11 | 293  | homodimer |
| 1cdc | A | 96  | 13 | 13 | 0   | 312  | homodimer |
| 1cg2 | A | 389 | 48 | 51 | -3  | 138  | homodimer |
| 1chm | A | 401 | 41 | 55 | -14 | 1158 | homodimer |
| 1cmb | A | 104 | 15 | 19 | -4  | 676  | homodimer |
| 1cnz | A | 363 | 37 | 47 | -10 | 656  | homodimer |
| 1coz | A | 126 | 19 | 23 | -4  | 133  | homodimer |
| 1csh | A | 435 | 41 | 41 | 0   | 734  | homodimer |
| 1ctt | A | 294 | 21 | 30 | -9  | 313  | homodimer |
| 1cvu | A | 552 | 56 | 59 | -3  | 996  | homodimer |
| 1czj | A | 110 | 11 | 15 | -4  | 503  | homodimer |
| 1daa | A | 277 | 36 | 41 | -5  | 479  | homodimer |
| 1dor | A | 311 | 27 | 37 | -10 | 433  | homodimer |
| 1dpg | A | 485 | 54 | 76 | -22 | 303  | homodimer |
| 1dqs | A | 381 | 47 | 44 | 2   | 495  | homodimer |
| 1dxg | A | 36  | 3  | 7  | -4  | 86   | homodimer |
| 1e98 | A | 210 | 32 | 29 | 3   | 264  | homodimer |
| 1ebh | A | 436 | 51 | 56 | -5  | 539  | homodimer |
| 1f13 | A | 722 | 81 | 95 | -12 | 1676 | homodimer |
| 1fip | A | 73  | 11 | 7  | 3   | 521  | homodimer |
| 1fro | A | 176 | 23 | 28 | -5  | 395  | homodimer |
| 1gvp | A | 87  | 10 | 7  | 3   | 178  | homodimer |
| 1hhp | A | 99  | 10 | 8  | 1   | 401  | homodimer |
| 1hjr | A | 158 | 15 | 12 | 3   | 515  | homodimer |
| 1hss | A | 111 | 11 | 10 | 1   | 292  | homodimer |
| 1hxp | A | 340 | 33 | 42 | -9  | 798  | homodimer |

|      |   |     |    |    |     |      |           |
|------|---|-----|----|----|-----|------|-----------|
| 1icw | A | 69  | 13 | 8  | 4   | 297  | homodimer |
| 1imb | A | 273 | 27 | 34 | -5  | 326  | homodimer |
| 1isa | A | 192 | 13 | 19 | -6  | 212  | homodimer |
| 1ivy | A | 452 | 38 | 43 | -5  | 537  | homodimer |
| 1jhg | A | 101 | 13 | 16 | -3  | 688  | homodimer |
| 1jsg | A | 111 | 13 | 18 | -5  | 210  | homodimer |
| 1kba | A | 66  | 5  | 4  | 2   | 259  | homodimer |
| 1kpf | A | 111 | 12 | 13 | -2  | 450  | homodimer |
| 1lyn | A | 125 | 22 | 11 | 11  | 357  | homodimer |
| 1m6p | A | 146 | 19 | 19 | -1  | 186  | homodimer |
| 1mkb | A | 171 | 20 | 21 | -1  | 360  | homodimer |
| 1mor | A | 366 | 34 | 47 | -13 | 424  | homodimer |
| 1nox | A | 200 | 27 | 23 | 3   | 297  | homodimer |
| 1nse | A | 416 | 40 | 44 | -4  | 1275 | homodimer |
| 1nsy | A | 271 | 36 | 46 | -10 | 207  | homodimer |
| 1oac | A | 719 | 74 | 95 | -21 | 1067 | homodimer |
| 1opy | A | 123 | 9  | 16 | -7  | 284  | homodimer |
| 1pgt | A | 210 | 20 | 23 | -3  | 169  | homodimer |
| 1pre | A | 449 | 40 | 47 | -8  | 1242 | homodimer |
| 1qfh | A | 212 | 20 | 29 | -8  | 1204 | homodimer |
| 1qhi | A | 304 | 24 | 27 | -2  | 314  | homodimer |
| 1qr2 | A | 230 | 22 | 26 | -4  | 349  | homodimer |
| 1r2f | A | 283 | 23 | 35 | -12 | 370  | homodimer |
| 1reg | A | 122 | 21 | 18 | 3   | 371  | homodimer |
| 1rfb | A | 119 | 18 | 19 | -1  | 211  | homodimer |
| 1rpo | A | 61  | 7  | 13 | -6  | 651  | homodimer |
| 1ses | A | 421 | 58 | 62 | -4  | 1125 | homodimer |
| 1slt | A | 130 | 13 | 16 | -3  | 214  | homodimer |
| 1smn | A | 241 | 24 | 24 | 0   | 584  | homodimer |
| 1smt | A | 98  | 9  | 9  | -1  | 670  | homodimer |
| 1sox | A | 463 | 46 | 59 | -13 | 1219 | homodimer |
| 1tcl | A | 175 | 24 | 25 | -1  | 456  | homodimer |
| 1tox | A | 515 | 51 | 65 | -12 | 1661 | homodimer |
| 1trk | A | 678 | 65 | 69 | -4  | 319  | homodimer |
| 1uby | A | 348 | 44 | 51 | -7  | 678  | homodimer |
| 1utg | A | 70  | 9  | 10 | -1  | 300  | homodimer |
| 1vfr | A | 217 | 24 | 32 | -8  | 378  | homodimer |
| 1vok | A | 192 | 30 | 16 | 14  | 898  | homodimer |
| 1wtl | A | 108 | 8  | 8  | -1  | 235  | homodimer |
| 1xso | A | 150 | 12 | 19 | -7  | 242  | homodimer |
| 2arc | A | 161 | 14 | 16 | -3  | 359  | homodimer |
| 2ccy | A | 127 | 17 | 15 | 2   | 270  | homodimer |

|      |   |     |    |    |     |      |           |
|------|---|-----|----|----|-----|------|-----------|
| 2hdh | A | 286 | 37 | 35 | 3   | 815  | homodimer |
| 2ilk | A | 155 | 22 | 21 | 1   | 692  | homodimer |
| 2lig | A | 157 | 11 | 14 | -3  | 209  | homodimer |
| 2mcg | A | 215 | 17 | 18 | -1  | 510  | homodimer |
| 2nac | A | 374 | 38 | 48 | -10 | 282  | homodimer |
| 2ohx | A | 374 | 42 | 38 | 4   | 725  | homodimer |
| 2spc | A | 107 | 15 | 20 | -5  | 880  | homodimer |
| 2sqc | A | 623 | 69 | 82 | -13 | 1279 | homodimer |
| 2tct | A | 198 | 21 | 26 | -5  | 783  | homodimer |
| 2tgi | A | 112 | 11 | 10 | 1   | 485  | homodimer |
| 3dap | A | 320 | 30 | 45 | -15 | 425  | homodimer |
| 3grs | A | 461 | 50 | 49 | 1   | 1027 | homodimer |
| 3sdh | A | 145 | 19 | 15 | 4   | 446  | homodimer |
| 3ssi | A | 108 | 6  | 10 | -4  | 439  | homodimer |
| 4cha | A | 11  | 0  | 0  | 0   | 97   | homodimer |
| 4kbp | A | 424 | 47 | 43 | 5   | 1959 | homodimer |
| 5csm | A | 250 | 37 | 39 | -2  | 280  | homodimer |
| 5rub | A | 436 | 43 | 48 | -6  | 836  | homodimer |
| 8prk | A | 282 | 35 | 43 | -8  | 382  | homodimer |
| 9wga | A | 170 | 10 | 9  | 2   | 186  | homodimer |

## References:

1. Kamagata, K., E. Mano, K. Ouchi, S. Kanbayashi, and R.C. Johnson. 2018. High Free-Energy Barrier of 1D Diffusion Along DNA by Architectural DNA-Binding Proteins. *J. Mol. Biol.* 430: 655–667.
2. Kochaniak, A.B., S. Habuchi, J.J. Loparo, D.J. Chang, K.A. Cimprich, J.C. Walter, and A.M. van Oijen. 2009. Proliferating cell nuclear antigen uses two distinct modes to move along DNA. *J. Biol. Chem.* 284: 17700–17710.
3. Laurence, T.A., Y. Kwon, A. Johnson, C.W. Hollars, M. O'Donnell, J.A. Camarero, and D. Barsky. 2008. Motion of a DNA sliding clamp observed by single molecule fluorescence spectroscopy. *J. Biol. Chem.* 283: 22895–22906.
4. Tafvizi, A., F. Huang, A.R. Fersht, L.A. Mirny, and A.M. van Oijen. 2011. A single-molecule characterization of p53 search on DNA. *Proc. Natl. Acad. Sci. U. S. A.* 108: 563–568.
5. Blainey, P.C., G. Luo, S.C. Kou, W.F. Mangel, G.L. Verdine, B. Bagchi, and X.S. Xie. 2009. Nonspecifically bound proteins spin while diffusing along DNA. *Nat. Struct. Mol. Biol.* 16: 1224–1229.
6. Elf, J., G.W. Li, and X.S. Xie. 2007. Probing transcription factor dynamics at the single-molecule level in a living cell. *Science* (80- ). 316: 1191–1194.
7. Dikić, J., C. Menges, S. Clarke, M. Kokkinidis, A. Pingoud, W. Wende, and P. Desbiolles. 2012. The rotation-coupled sliding of EcoRV. *Nucleic Acids Res.* 40: 4064–4070.
8. Gorman, J., A. Chowdhury, J.A. Surtees, J. Shimada, D.R. Reichman, E. Alani, and E.C. Greene. 2007. Dynamic Basis for One-Dimensional DNA Scanning by the Mismatch Repair Complex Msh2-Msh6. *Mol. Cell.* 28: 359–370.
9. Harada, Y., T. Funatsu, K. Murakami, Y. Nonoyama, A. Ishihama, and T. Yanagida. 1999. Single-molecule imaging of RNA polymerase-DNA interactions in real time. *Biophys. J.* 76: 709–715.
10. Cuculis, L., Z. Abil, H. Zhao, and C.M. Schroeder. 2016. TALE proteins search DNA using a rotationally decoupled mechanism. *Nat. Chem. Biol.* 12: 831–837.
11. Sahu, D., and J. Iwahara. 2017. Discrete-State Kinetics Model for NMR-Based Analysis of Protein Translocation on DNA at Equilibrium. *J. Phys. Chem. B.* 121: 9548–9556.
12. Hinrichs, M.H., A. Jalal, B. Brenner, E. Mandelkow, S. Kumar, and T. Scholz. 2012.

- Tau protein diffuses along the microtubule lattice. *J. Biol. Chem.* 287: 38559–38568.
13. Mcvicker, D.P., G.J. Hoepflich, A.R. Thompson, and C.L. Berger. 2014. Tau interconverts between diffusive and stable populations on the microtubule surface in an isoform and lattice specific manner. *Cytoskeleton*. 71: 184–194.
  14. Scholz, T., and E. Mandelkow. 2014. Transport and diffusion of Tau protein in neurons. *Cell. Mol. Life Sci.* 71: 3139–3150.
  15. Forth, S., K.C. Hsia, Y. Shimamoto, and T.M. Kapoor. 2014. Asymmetric friction of nonmotor MAPs can lead to their directional motion in active microtubule networks. *Cell*. 157: 420–432.
  16. Brouhard, G.J., J.H. Stear, T.L. Noetzel, J. Al-Bassam, K. Kinoshita, S.C. Harrison, J. Howard, and A.A. Hyman. 2008. XMAP215 Is a Processive Microtubule Polymerase. *Cell*. 132: 79–88.
  17. Culver-Hanlon, T.L., S.A. Lex, A.D. Stephens, N.J. Quintyne, and S.J. King. 2006. A microtubule-binding domain in dynactin increases dynein processivity by skating along microtubules. *Nat. Cell Biol.* 8: 264–270.
  18. Dixit, R., B. Barnett, J.E. Lazarus, M. Tokito, Y.E. Goldman, and E.L.F. Holzbaur. 2009. Microtubule plus-end tracking by CLIP-170 requires EB1. *Proc. Natl. Acad. Sci.* 106: 492–497.
  19. Noujaim, M., S. Bechstedt, M. Wicczorek, and G.J. Brouhard. 2014. Microtubules accelerate the kinase activity of Aurora-B by a reduction in dimensionality. *PLoS One*. 9: e86786.
  20. Chakraborty, M., E. V. Tarasovets, A. V. Zaytsev, M. Godzi, A.C. Figueiredo, F.I. Ataulakhanov, and E.L. Grishchuk. 2019. Microtubule end conversion mediated by motors and diffusing proteins with no intrinsic microtubule end-binding activity. *Nat. Commun.* 10.
  21. Lopez, B.J., and M.T. Valentine. 2016. The +TIP coordinating protein EB1 is highly dynamic and diffusive on microtubules, sensitive to GTP analog, ionic strength, and EB1 concentration. *Cytoskeleton*. 73: 23–34.
  22. Powers, A.F., A.D. Franck, D.R. Gestaut, J. Cooper, B. Gracyzk, R.R. Wei, L. Wordeman, T.N. Davis, and C.L. Asbury. 2009. The Ndc80 Kinetochore Complex Forms Load-Bearing Attachments to Dynamic Microtubule Tips via Biased Diffusion. *Cell*. 136: 865–875.
  23. Helenius, J., G. Brouhard, Y. Kalaidzidis, S. Diez, and J. Howard. 2006. The depolymerizing kinesin MCAK uses lattice diffusion to rapidly target microtubule ends.

- Nature. 441: 115–119.
24. Ali, M.Y., E.B. Krementsova, G.G. Kennedy, R. Mahaffy, T.D. Pollard, K.M. Trybus, and D.M. Warshaw. 2007. Myosin Va maneuvers through actin intersections and diffuses along microtubules. *Proc. Natl. Acad. Sci.* 104: 4332–4336.
  25. Kwok, B.H., L.C. Kapitein, J.H. Kim, E.J.G. Peterman, C.F. Schmidt, and T.M. Kapoor. 2006. Allosteric inhibition of kinesin-5 modulates its processive directional motility. *Nat. Chem. Biol.* 2: 480–485.
  26. Bormuth, V., V. Varga, J. Howard, and E. Schäffer. 2009. Protein friction limits diffusive and directed movements of kinesin motors on microtubules. *Science* (80-. ). 325: 870–873.
  27. Vale, R.D., D.R. Soll, and I.R. Gibbons. 1989. One-dimensional diffusion of microtubules bound to flagellar dynein. *Cell.* 59: 915–925.
  28. Kim, Y., J.E. Heuser, C.M. Waterman, and D.W. Cleveland. 2008. CENP-E combines a slow, processive motor and a flexible coiled coil to produce an essential motile kinetochore tether. *J. Cell Biol.* 181: 411–419.
  29. Gudimchuk, N., B. Vitre, Y. Kim, A. Kiyatkin, D.W. Cleveland, F.I. Ataullakhanov, and E.L. Grishchuk. 2013. Kinetochore kinesin CENP-E is a processive bi-directional tracker of dynamic microtubule tips. *Nat. Cell Biol.* 15: 1079–1088.
  30. Chugh, M., M. Reißner, M. Bugiel, E. Lipka, A. Herrmann, B. Roy, S. Müller, and E. Schäffer. 2018. Phragmoplast Orienting Kinesin 2 Is a Weak Motor Switching between Processive and Diffusive Modes. *Biophys. J.* 115: 375–385.
